# Supplementary material
Source: Royal Society of Chemistry journal article supplement (doi:10.1039/d6cc01910b)
Supplement: d6cc01910b1.pdf [file d6cc01910b1.pdf]

## Supporting Information

# Dopant-Driven 0D-to-3D Phase Transition in Perovskite Nanocrystals via Interfacial Ligand Shuttling

Yi Wei,<sup>a</sup> Yongfei Li,<sup>a</sup> Liang Li,<sup>b</sup> Zhaohui Liu<sup>\*a</sup> and Ke Xin Yao<sup>\*a</sup>

<sup>a</sup> School of Chemistry and Chemical Engineering, Chongqing University, Chongqing 400044, China. Email: zhaohui.liu@cqu.edu.cn and kexinyao@cqu.edu.cn

<sup>b</sup> Department of Sciences and Engineering, Sorbonne University Abu Dhabi, PO Box 38044, Abu Dhabi, UAE

\*Corresponding author E-mail: zhaohui.liu@cqu.edu.cn and kexinyao@cqu.edu.cn

## Materials and Methods

### I. Chemicals.

Cesium acetate ( $\text{Cs}_2\text{CO}_3$ , 99.99%), oleic acid (OA, AR), oleylamine (OAm, 80-90%), Octadecene (ODE, 90%),  $\text{PbBr}_2$  (99.999%),  $\text{PbCl}_2$  (99.999%), hydrobromic acid (HBr, 48%),  $\text{MnCl}_2 \cdot 4\text{H}_2\text{O}$  (99.99%),  $\text{MnBr}_2 \cdot 4\text{H}_2\text{O}$  (98%), 1-Butylamine ( $\geq 99\%$ ), 1-Octylamine (99%), 1-Dodecanamine (98%) and 3-Aminopentane ( $\geq 98\%$ ) were purchased from Aladdin. Aniline ( $\geq 99.5\%$ ) were purchased from Macklin. N,N-dimethylformamide (DMF, 99.5%) was purchased from Chengdu Kelong Chemical Co., Ltd. (Chengdu, China). n-Hexane (97%) and hydrochloric acid (HCl, 36-38%) were purchased from Chuandong Chemical Co., Ltd. (Chongqing, China). All chemicals were directly used without further purification.

### II. Synthesis of precursor.

**Cs-cleate (Cs-OA) stock solution:** 0.45 g of  $\text{Cs}_2\text{CO}_3$  was mixed with 4.3 mL of OA and degassed by stirring under vacuum at  $100^\circ\text{C}$  for 1 h to generate a yellowish stock of Cs-OA precursor. The Cs-OA was stored at room temperature.

**$\text{PbBr}_2$  stock solution:** A mixture of 0.011 g  $\text{PbBr}_2$ , 1 mL DMF, 15  $\mu\text{L}$  HBr, 0.1 mL OA, and 0.05 mL OAm was set aside.

**$\text{PbCl}_2$  stock solution:** A mixture of 0.0083 g  $\text{PbCl}_2$ , 1 mL DMF, 15  $\mu\text{L}$  HCl, 0.1 mL OA, and 0.05 mL OAm was set aside.

**Cs<sub>4</sub>PbBr<sub>6</sub> NCs:** Firstly, 0.2 mL of Cs-OA precursor, 5 mL of OA were loaded into a 50 mL three-neck flask, which was degassed and purged with nitrogen at room temperature, and then 10 mL of hexane was added. Subsequently, the PbBr<sub>2</sub> precursor was rapidly injected into the flask with vigorous stirring for 10 min. The synthesized NCs were centrifuged at 8000 rpm for 3 min and then dispersed in 8 mL of hexane.

**Cs<sub>4</sub>PbCl<sub>6</sub> NCs:** PbBr<sub>2</sub> was replaced by an equimolar amount of PbCl<sub>2</sub> in the above-described Cs<sub>4</sub>PbBr<sub>6</sub> NCs synthesis, with all other conditions kept the same.

**Saturated aqueous solution of MnCl<sub>2</sub>:** Dissolve 1.1622 g of MnCl<sub>2</sub>•4H<sub>2</sub>O in 1 mL of deionized water and store at room temperature.

**Saturated aqueous solution of MnBr<sub>2</sub>:** Dissolve 1.9503 g of MnBr<sub>2</sub>•4H<sub>2</sub>O in 1 mL of deionized water and store at room temperature.

**Saturated aqueous solution of PbCl<sub>2</sub>:** Dissolve 0.0100 g of PbCl<sub>2</sub> in 1 mL of deionized water and store at room temperature.

### **III. Post-synthetic ion exchange reaction**

**Mn<sup>2+</sup> treated Cs<sub>4</sub>PbBr<sub>6</sub> NCs:** In the first step, 50 μL of a saturated aqueous solution of manganese salts (MnX<sub>2</sub>, X=Br, Cl) was added to 2 mL of hexane containing OAm. The mixed solution was shaken for 30 s and then the hexane solution of the upper phase was centrifuged in a tube at 9000 rpm for 5 min. The hexane solution of the upper phase containing MnX<sub>2</sub> was retained for further use and the precipitate was

discarded. Then, 1 mL of hexane containing  $\text{MnX}_2$  prepared in the first step was mixed with 1 mL of prepared  $\text{Cs}_4\text{PbBr}_6$  NCs and stirred.

**$\text{Mn}^{2+}$  treated  $\text{Cs}_4\text{PbCl}_6$  NCs:** The same doping method described above was applied, except that  $\text{Cs}_4\text{PbCl}_6$  NCs was used in place of  $\text{Cs}_4\text{PbBr}_6$  NCs.

**$\text{Pb}^{2+}$  treated  $\text{Cs}_4\text{PbBr}_6$  NCs:** The same doping method described above was applied, except that the saturated aqueous solution of manganese salt ( $\text{MnX}_2$ ,  $X = \text{Br}, \text{Cl}$ ) was replaced by the saturated aqueous solution of  $\text{PbCl}_2$ .

#### **IV. Synthesis of $\text{CsPbBr}_3$ NCs**

In a typical synthesis<sup>1</sup>, 5 mL of ODE and 0.069 g of  $\text{PbBr}_2$  were loaded into a 25 mL three-necked flask. The mixture was dried under vacuum for 1 hour at 120 °C.

Subsequently, 0.5 mL of OAm and 0.5 mL of OA were injected at 120 °C under  $\text{N}_2$ .

After complete solubilisation of  $\text{PbBr}_2$ , the temperature was raised to 160 °C,

followed by the quickly injection of 0.4 mL of a Cs-oleate precursor solution. This

precursor was prepared by dissolving 0.814 g of  $\text{Cs}_2\text{CO}_3$  and 2.5 mL of OA in 40 mL of ODE, followed by vacuum drying. The reaction was allowed to proceed for 5 s

before being cooled by the ice-water bath. The as-synthesized NCs were collected by centrifugation at 6000 rpm for 5 minutes and subsequently dispersed in hexane.

#### **V. Materials Characterization.**

Transmission electron microscopy (TEM) images were obtained with a Talos F200S operated at 200 kV. Specimens for the TEM images were prepared by dropping a drop

of diluted dispersed solution of nanocrystals in hexane on a carbon-coated copper grid or Nano-Chip. Patterns of nanocrystal samples were obtained using a PANalytical Instrument with Cu K $\alpha$ . All XRD samples were prepared by drop casting a concentrated solution on a zero diffraction silicon wafer. Ultraviolet visible (UV-vis) absorption spectra were taken by using a UV-vis spectrophotometer (UV-3600, Shimadzu). Photoluminescence (PL) spectra were measured with a fluorescence spectrophotometer (RF-6000). TRPL spectra were collected by Edinburgh fluorescence spectroscopy (FLS1000) with an EPL-375 light source. For UV-vis absorption, PL and PL lifetime measurements, the sample was dispersed in hexane and taken in a cuvette. Elemental analysis was used to determine the elemental contents of Mn and Pb using a Thermo ICAP PRO inductively coupled plasma-optical emission spectrometer (ICP-OES). Fourier transform infrared spectroscopy (FTIR) measurements were performed on Fourier Transform Infrared Spectrometer (Nicolet iS50) with an ATR attachment.

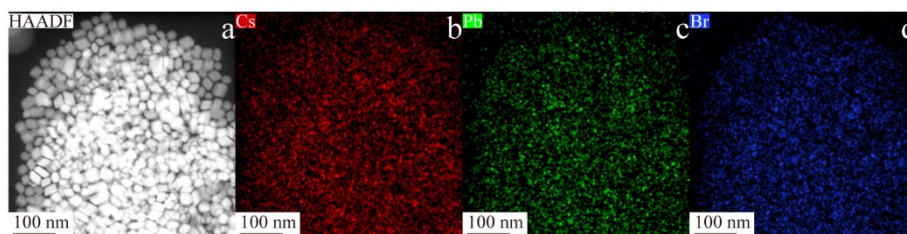

### Supporting Figures

**Fig. S1** (a) HAADF-STEM image of original  $\text{Cs}_4\text{PbBr}_6$  NCs and the corresponding elemental mappings of (b) Cs, (c) Pb and (d) Br.

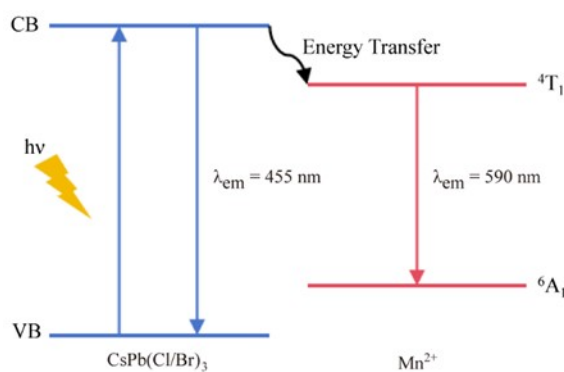

**Fig. S2** Energy level diagram of the NCs following  $\text{Mn}^{2+}$  doping.

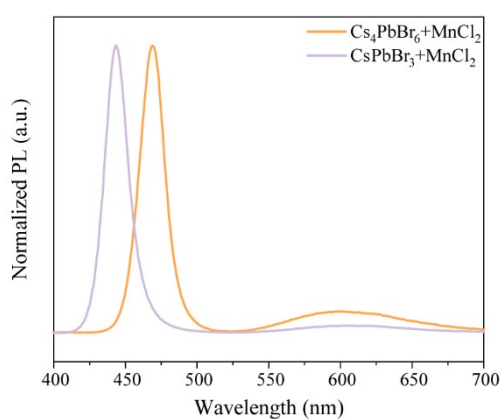

**Fig. S3** The PL spectra of  $\text{MnCl}_2$ -treated  $\text{Cs}_4\text{PbBr}_6$  NCs and  $\text{CsPbBr}_3$  NCs were measured after a post-treatment reaction time of 10 min.

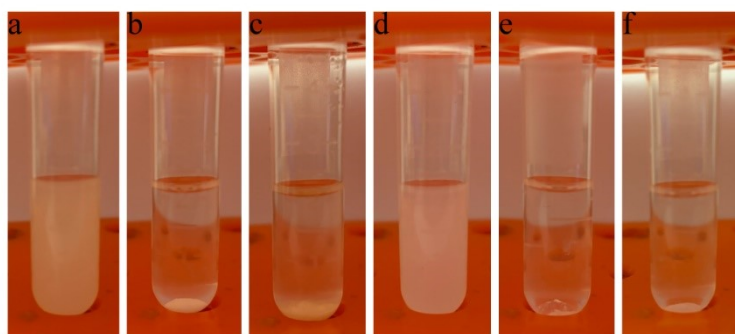

**Fig. S4** Photographs of doped precursors prepared using different kinds of amines, including (a) OAm, (b) 1-Butylamine, (c) 1-Octylamine, (d) 1-Dodecanamin, (e) Aniline, (f) 3-Aminopentane.

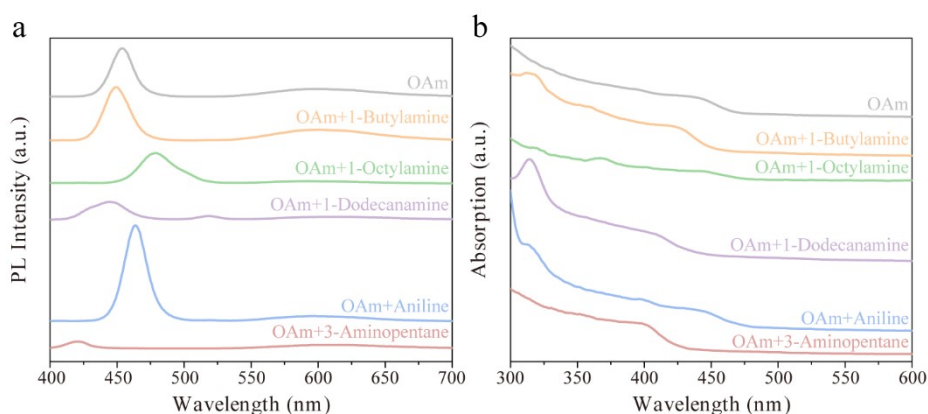

**Fig. S5** (a) PL and (b) UV-Vis spectra of the post-synthetic samples after using both OAm and another amine in the preparation of the doped precursors.

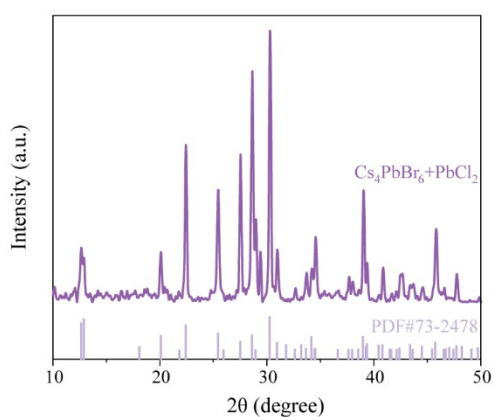

**Fig. S6** XRD spectrum of  $\text{PbCl}_2$  treated  $\text{Cs}_4\text{PbBr}_6$  NCs.

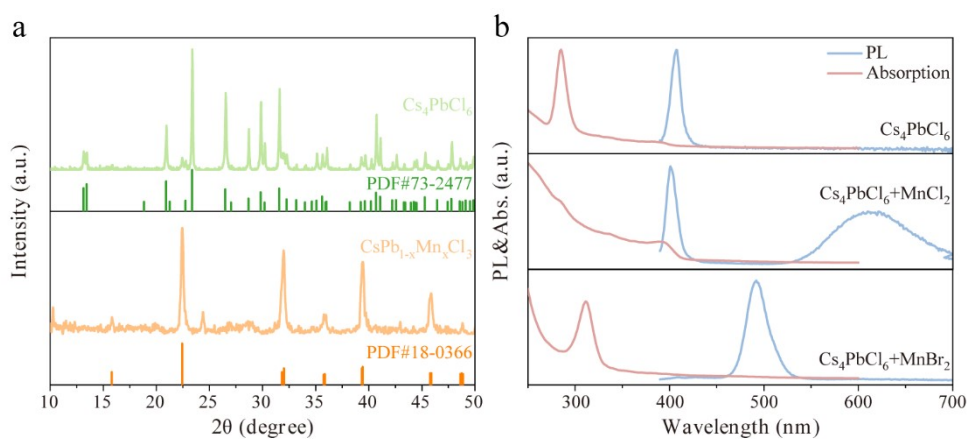

**Fig. S7** (a) XRD spectra of  $\text{Cs}_4\text{PbCl}_6$  NCs before (green) and after (orange)  $\text{Mn}^{2+}$  doping. (b) PL and UV-Vis spectra of original  $\text{Cs}_4\text{PbCl}_6$  NCs,  $\text{MnCl}_2$  treated  $\text{Cs}_4\text{PbCl}_6$  NCs and  $\text{MnBr}_2$  treated  $\text{Cs}_4\text{PbCl}_6$  NCs.

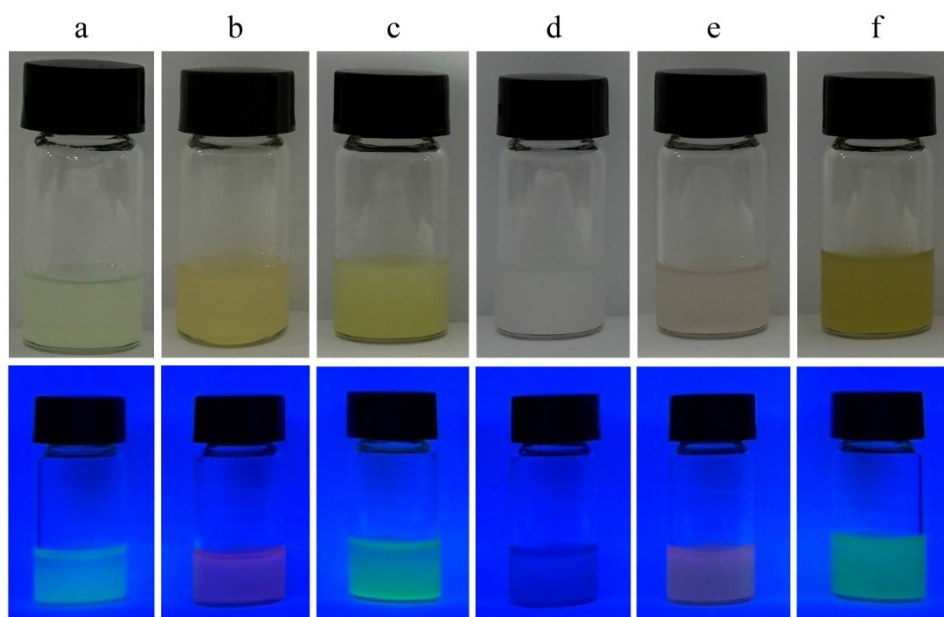

**Fig. S8** Photographs of the samples under irradiation with and without UV lamps, the upper picture is without UV lamps and the lower picture is under UV lamps with a wavelength of 395 nm for (a) original  $\text{Cs}_4\text{PbBr}_6$  NCs, (b)  $\text{MnCl}_2$  treated  $\text{Cs}_4\text{PbBr}_6$  NCs, (c)  $\text{MnBr}_2$  treated  $\text{Cs}_4\text{PbBr}_6$  NCs, (d) original  $\text{Cs}_4\text{PbCl}_6$  NCs, (e)  $\text{MnCl}_2$  treated  $\text{Cs}_4\text{PbCl}_6$  NCs, (f)  $\text{MnBr}_2$  treated  $\text{Cs}_4\text{PbCl}_6$  NCs.

**Table S1.** Fitted parameters of the PL decay curves.

| Sample Name                                                  | Emission Wavelength   | $A_1$      | $\tau_1$  | $A_2$               | $\tau_2$  | $\tau_{ave}$ |
|--------------------------------------------------------------|-----------------------|------------|-----------|---------------------|-----------|--------------|
| Cs <sub>4</sub> PbBr <sub>6</sub> NCs                        | $\lambda_{em}=515$ nm | 154089.219 | 3.876 ns  | 811.974             | 22.740 ns | 4.44 ns      |
| CsPb <sub>1-x</sub> Mn <sub>x</sub> (Cl/Br) <sub>3</sub> NCs | $\lambda_{em}=455$ nm | 2000.133   | 11.334 ns | $2.284 \times 10^7$ | 2.035 ns  | 2.04 ns      |
|                                                              | $\lambda_{em}=590$ nm | 556.343    | 0.196 ms  | 815.700             | 0.694 ms  | 0.61 ms      |

**Notes and references**

- 1 L. Protesescu, S. Yakunin, M. I. Bodnarchuk, F. Krieg, R. Caputo, C. H. Hendon, R. X. Yang, A. Walsh and M. V. Kovalenko, *Nano Lett.*, 2015, **15**, 3692-3696.
